# Supplementary material
Source: PubMed Central journal article supplement (PMC2590760)
Supplement: NIHMS9275-supplement-CommBCLsupp.pdf [file NIHMS9275-supplement-CommBCLsupp.pdf]

## Supplemental Figure

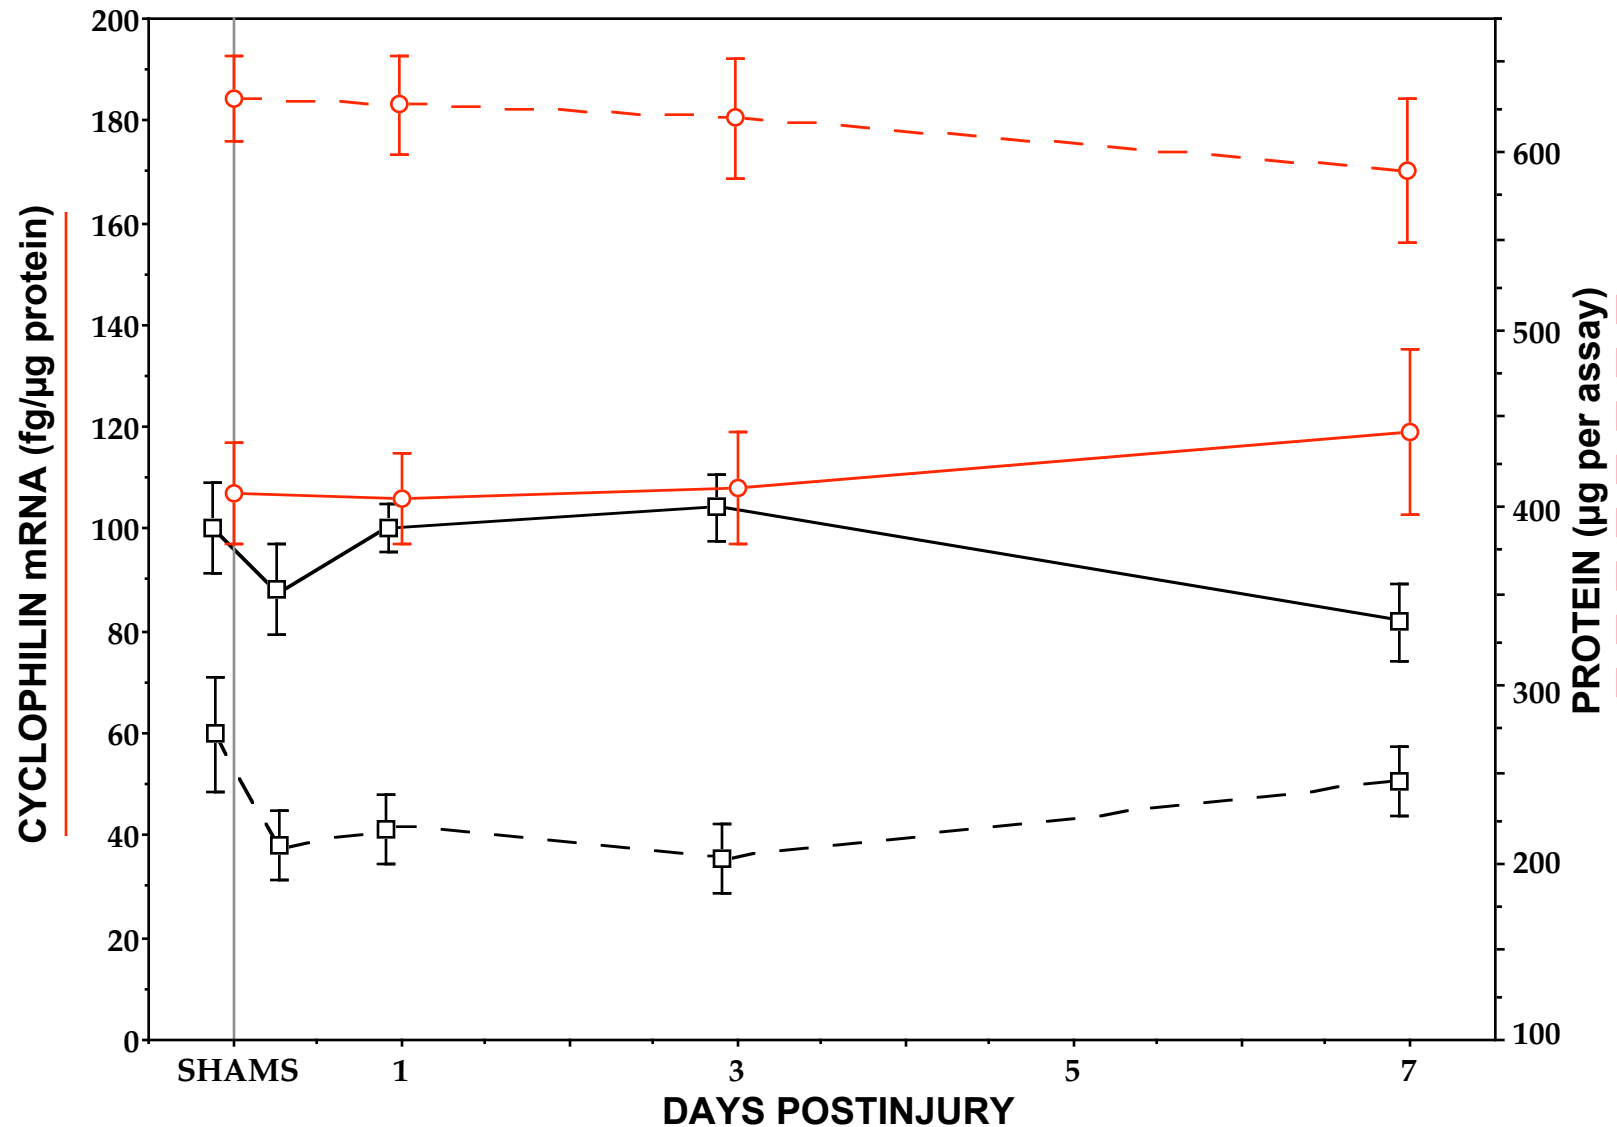

Cortex cyclophilin mRNA (solid lines) and total protein (dashed line) do not change significantly after LFP (circles) or LCI (squares) TBI. Note that cyclophilin levels, normalized to sample protein, are similar in the two models despite differences in sample collection. Absolute cyclophilin levels (amol) were similar in profile to protein normalized levels.
